# Supplementary material
Source: PubMed Central journal article supplement (PMC2757999)
Supplement: supp_M109.016808_jbc.M109.016808-1.pdf [file supp_M109.016808_jbc.M109.016808-1.pdf]

Gao et al., Supplementary Fig. 1

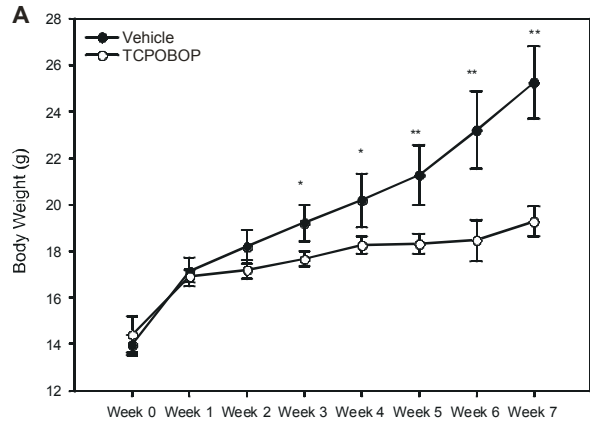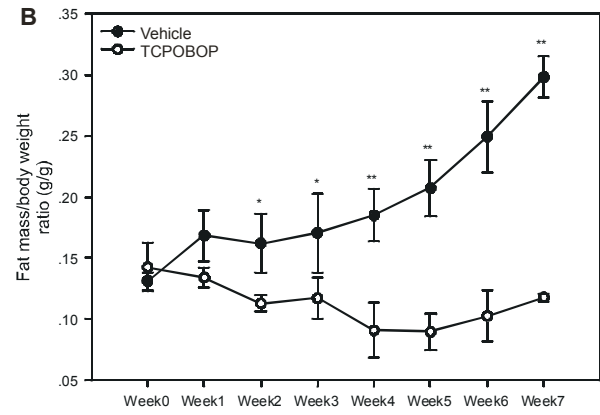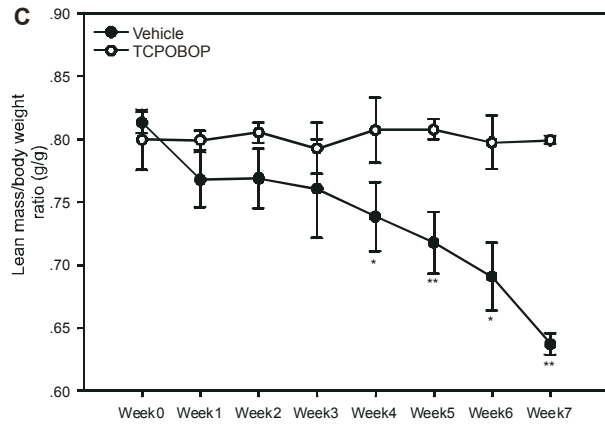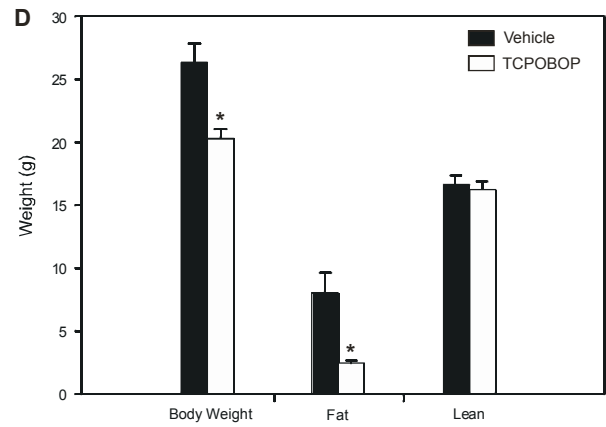

Gao et al., Supplementary Fig. 2

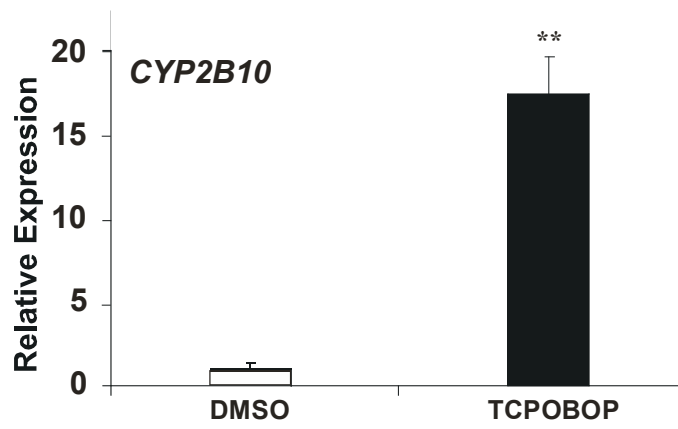

Gao et al., Supplementary Fig. 3

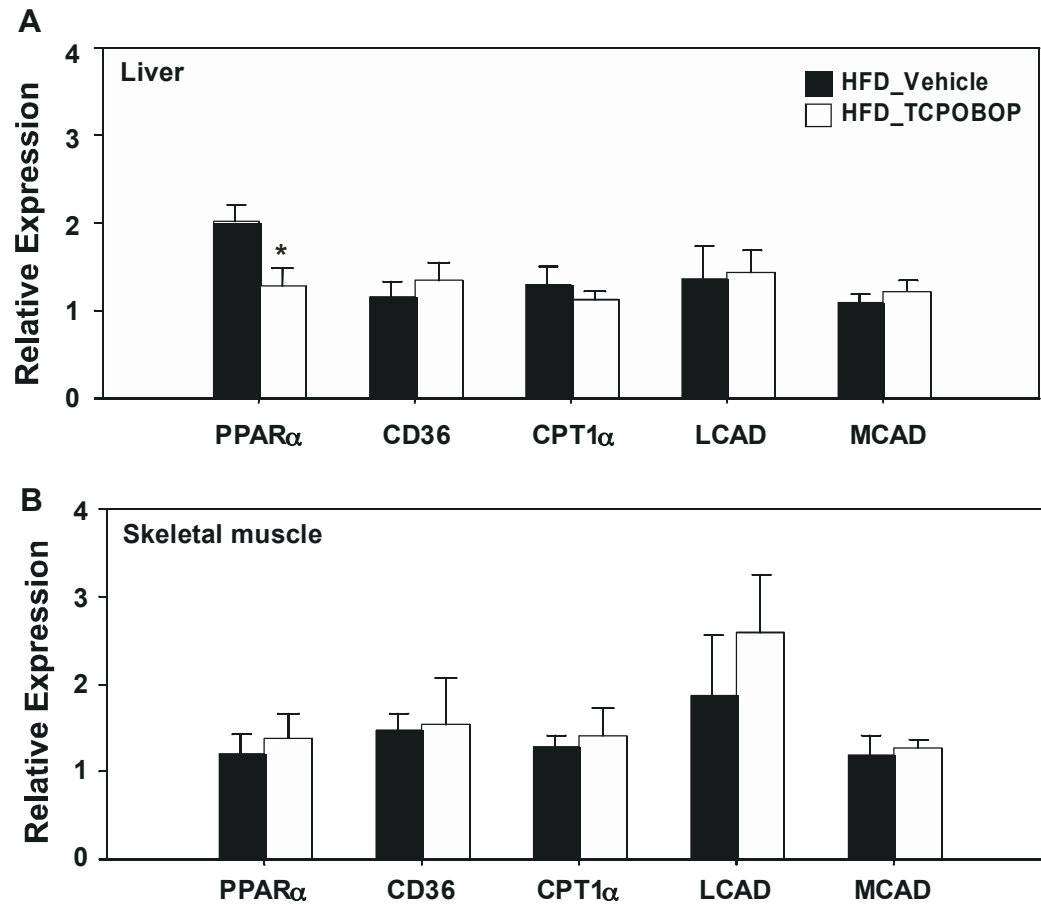

**Supplementary Table 1: Sequences of real-time PCR primers**

---

ACADL\_F: TCTTTTCCTCGGAGCATGACA  
ACADL\_R: GACCTCTCTACTCACTTCTCCAG  
ACADM\_F: TTGAGTTGACGGAACAGCAG  
ACADM\_R: CCCCAAAGAATTTGCTTCAA  
ACC1\_F: GCCTCTTCCTGACAAACGAG  
ACC1\_R: TGACTGCCGAAACATCTCTG  
AgRP\_F: GGCCTCAAGAAGACAACACTGC  
AgRP\_R: GACTCGTGCAGCCTTACACA  
ATGL\_F: TCCGAGAGATGTGCAAACAG  
ATGL\_R: CTCCAGCGGCAGAGTATAGG  
CD36\_F: CCTTAAAGGAATCCCCGTGT  
CD36\_R: TGCATTTGCCAATGTCTAGC  
CPT1b\_F: GGTCGCTTCTTCAAGGTCTG  
CPT1b\_R: CGAGGATTCTCTGGAAGTGC  
CYP2B10\_F: CATTTGTCTTGGTFAAAGCATT  
CYP2B10\_R: GGATGGACGTGAAGAAAAGGAA  
DIO2\_F: GATGCTCCCAATTCCAGTGT  
DIO2\_R: TGAACCAAAGTTGACCACCA  
FABP1\_F: AAATCGTGCATGAAGGGAAG  
FABP1\_R: GTCTCCAGTTCGCACTCCTC  
FABP6\_F: CACCATTGGCAAAGAATGTG  
FABP6\_R: AACTTGTCACCCACGACCTC  
FAS\_F: CCCTTGATGAAGAGGGATCA  
FAS\_R: ACTCCACAGGTGGGAACAAG  
G6Pase\_F: TCTGCCCCAGGAATCAAAAAT  
G6Pase\_R: TGGGCAAAAATGGCAAGGA  
GRP78\_F: CAGATCTTCTCCACGGCTTC  
GRP78\_R: AGCAGGAGGAATTCCAGTCA

GPR94\_F: TCAGTCACACCTGCCAGTTC  
GPR94\_R: TGCCTGCTGTCCTTACTCCT  
HMGC<sub>o</sub>AR\_F: CTTGTGGAATGCCTTGTGATTG  
HMGC<sub>o</sub>AR\_R: AGCCGAAGCAGCACATGAT  
HMGCS2\_F: ATCAACTCCCTGTGCCTGAC  
HMGCS2\_R: GCAATGTCACCACAGACCAC  
HSL\_F: GCTTGGTTCAACTGGAGAGC  
HSL\_R: GCCTAGTGCCTTCTGGTCTG  
LCAD\_F: TCTTTTCCTCGGAGCATGACA  
LCAD\_R: GACCTCTCTACTCACTTCTCCAG  
MCAD\_F: TTGAGTTGACGGAACAGCAG  
MCAD\_R: CCCCAAAGAATTTGCTTCAA  
MTP\_F: CCTACCAGGCCCAACAAGAC  
MTP\_R: CGCTCAATTTTGCATGTATCC  
NPY\_F: TGGACTGACCCTCGCTCTAT  
NPY\_R: TAGTGTCGCAGAGCGGAGTA  
PEPCK\_F: AGGAGGAGTACGGGCAGTTG  
PEPCK\_R: CTTCAGCTTGCGGATGACA  
PGC-1 $\alpha$ \_F: GACTCAGTGTCACCACCGAAA  
PGC-1 $\alpha$ \_R: TGAACGAGAGCGCATCCT  
PGC-1 $\beta$ \_F: TTGTAGAGTGCCAGGTGCTG  
PGC-1 $\beta$ \_R: GATGAGGGAAGGGACTCCTC  
POMC\_F: CATTAGGCTTGGAGCAGGTC  
POMC\_R: CTTCTCGGAGGTCATGAAGC  
PPAR $\alpha$ \_F: TGTCGAATATGTGGGGACAA  
PPAR $\alpha$ \_R: AATCTTGCAGCTCCGATCAC  
SCD1\_F: TTCTTACACGACCACCACCA  
SCD1\_R: CCGAAGAGGCAGGTGTAGAG

SOCS3\_F: AGCTCCAAAAGCGAGTACCA  
SOCS3\_R: AGCTGTCGCGGATAAGAAAG  
SREBP1c\_F: CCCTGTGTGTACTGGCCTTT  
SREBP1c\_R: TTGCGATGTCTCCAGAAGTG  
UCP1\_F: GGGCCCTTGTAACAACAAA  
UCP1\_R: GTCGGTCCTTCCTTGGTGTA  
UCP2\_F: GCGTTCTGGGTACCATCCTA  
UCP2\_R: GCTCTGAGCCCTTGGTGTAG  
UCP3\_F: ATGAGTTTTGCCTCCATTCG  
UCP3\_R: GGCGTATCATGGCTTGAAAT  
UGT1A1\_F: CCTATTTGGCGATCAGATGGA  
UGT1A1\_R: CCCCAGCTCCCCGAGTT  
XBP1\_F: TCAAATGTCCTTCCCCAGAG  
XBP1\_R: AAAGGGAGGCTGGTAAGGAA

---
